# Supplementary material
Source: MDPI journal article supplement (https://www.mdpi.com/2571-550X/5/4/47)
Supplement: s1 [file s1]

**Figure S1.** Quartz, feldspar dose rates within the studied LPS.

**Figure S2.** Dose response and decay curves obtained for different aliquots of quartz sample HU110119 at the depth of 840 cm.

**Figure S3.** Dose response and decay curves obtained for different aliquots of quartz sample HU110135 at the depth of 670 cm.

**Figure S4.** Dose response and decay curves obtained for different aliquots of quartz sample HU110139 at the depth of 610 cm.

**Figure S5.** Dose response and decay curves obtained for different aliquots of quartz sample HU110147 at the depth of 520 cm.

**Figure S6.** Dose response and decay curves obtained for different aliquots of quartz sample HU110165 at the depth of 340 cm.

**Figure S7.** Dose response and decay curves obtained for different aliquots of quartz sample HU110169 at the depth of 300 cm.

**Figure S8.** Dose response and decay curves obtained for different aliquots of polymineral pIRIRSL290 samples I.

**Figure S9.** Dose response and decay curves obtained for different aliquots of polymineral pIRIRSL290 samples II.

**Figure S10.** Dose response and decay curves obtained for different aliquots of polymineral pIRIRSL290 samples III.

**Table S1.** Age differences between modelled dates of Sümegi et al. (2020) (Model 1) and the present study (Model 2).

**Table S2.** Calibrated and modelled ages and calculated per sample age-depth intervals.

**Table S3.** Comparison of  $^{14}\text{C}$  and quartz OSL dates.

**Table S4.** Comparison of  $^{14}\text{C}$ , feldspar pIRIRSL50 and pIRIRSL290 dates.

**Table S5.** Water contents, radionuclide contents relevant to OSL and IRSL ages.
